# Supplementary material for: The Local Origin of the Tibetan Pig and Additional Insights into the Origin of Asian Pigs
Source: PLoS One. 2011 Dec 7;6(12):e28215. doi: 10.1371/journal.pone.0028215 (PMC3233571; doi:10.1371/journal.pone.0028215)
Supplement: Table S2 — Haplotype and geographical distributions across 15 regions. (XLS) [file pone.0028215.s003.xls]

## Sheet: Sheet2
Table S2. Haplotype and geographical distributions across 15 regions.
					Tibetan high land	Pacific Island	ISEA		SEA		Yunnan		URYZ		MDYZ		Taiwan		SC		MUYR		DRYR	Korean		Japan		NEC		SA		Total
Haplogroup	Subgroup		Haplotype	Haplotype variable site	Domestic	Domestic	Domestic	Wild	Domestic	Wild	Domestic	Wild	Domestic	Wild	Domestic	Wild	Domestic	Wild	Domestic	Wild	Domestic	Wild	Domestic	Domestic	Wild	Domestic	Wild	Domestic	Wild	Domestic	Wild	Domestic	Wild
				11111111 1111111111 1111111111 1111111111 1222222222 2222222222 2222223333 3333333333 3333333334 44444
				1111222233 3444455566 6666778888 9900011122 2222333344 4455555566 6777778888 9000112344 4566677778 8889990000 0001222224 4556888890 00111
				0257348901 2038914502 3467570789 0857901514 6789156724 5712357808 9124590134 4345341906 7956815681 4782390123 4562012366 7189678904 56257
M	M1		Hap7(core)	CAATCGGCAA AGACTATACT TAAAACTTGC GATTCGACTA CCATAACAAT TAATTTGCCG TGTCAACTCT GCATTTATCT GCTCTCTACC TACCGCCACC ATTAAATTCA CCGTAAATCT TGCTA	57		9		25		83	7	28	2	15	4	1				8		1			1		6	11			234	24
			Hap8(core)	.......... .......... .......... .......... .......... .......... .......... .......... ........T. .......... .......... .......... .....	20	1	5		25	1	2		12		70	15		1	24		13	1	65	5		1						243	18
			Hap9(core)	.......... .......... .......... .......... .......... .......... .......... ........T. .......... .......... .......... .......... .....	22		1		10	3	8	7	28	1	55	3	2		18	3	5		9				2			14		172	19
			Hap5(core)	.......... .......... .......... .......... .......... .......... .......... .......... .......... .......... ...G...... .......... .....	23		13		40	1	17	6	7		50	3			4	4	2		10			3	1	2				171	15
		sm.amts of core haplotype			122	1	28	0	100	5	110	20	75	3	190	25	3	1	46	7	28	1	85	5	0	5	3	8	11	14	0	820	76
			Hap15	.......... .......... .......... .......... .......... .......... .......... .......... .......... .......... .......... .........C .....	4	3	15		25	4	4	2	5		8				12				10									86	6
			Hap21	.......... .......... .......... .......... .......... .......... .......... ........T. .......... ......T... .......... .......... .....	3	2	6		13				3		7				24	1										1		59	1
			Hap37	.......... .......... .......... .......... .......... .......... .......... .......... ........T. .......... .......... ....G..... .....											1						1		49		1			18	10			69	11
			Hap11	.......... .......... .......... .......... .......... .......... .......... .......... A......... .......... .......... .......... .....	23						1		2		1						6											33	0
			Hap12	.......... .......... .......... .......... .......... .......... .......... ....C..... .......... .......... .......... .........C .....	3						10																					13	0
			Hap18	.......... .......... .......... .......... .......... .......... .......... .......... ........T. .......... .......... .......C.. .....	6				3		7																					16	0
			Hap30	.......... .......... .......... .......... .......... .......... ......T... .......... .......... .......... .......... .........C .....		1					6								10													17	0
			Hap34	.......... .......... .......... .......... .......... .......... .......... .......... .......... .......... .......... .......C.. .....	3		1						7																			11	0
			Hap51	.......... .......... .......... .......... .......... .......... .......... ........T. .......... .......... .......... .........C .....			1		17				1																			19	0
			Hap107	.......... .......... .......... .......... .......... .......... ......T... .......... ........T. .......... .......... .......... .....											4								10						4			14	4
			Hap172	.......... .......... .......... .......... ...C...... .......... .......... .......... .......... .......... .......... .......... .....		10																										10	0
			Hap179	.......... .......... .......... .......... .......... .......... .......... ....C...T. .......... .......... .......... .......... .....										1	1	3				11												1	15
			Hap183	.......... .......... .......... .......... .......... .......... .......... .......... .T........ .......... .......... .......... .....												1				11												0	12
			Hap10	.......... .......... .......... .......... .......... .......... .......... .......... .......... .......... ...G...... .......... .....	2																											2	0
			Hap13	.......... .......... .......... .......... .......... .......... .......... ....C..... .......... .......... .......... .......... .....	1						2		1		1	1																5	1
			Hap16	.......... .......... .......... .......... .......... .......... .......... .......... .......... .......... .......... .........C ....T	1						1																					2	0
			Hap17	.......... .......... .......... .......... .......... ......A... .......... .......... .......... .......... .......... .........C .....	2						2																					4	0
			Hap19	.......... .......... .......... .......... .......... .......... .......... .......... .......... .......... .......... .......... .C...							1																					1	0
			Hap20	.......... .....T.... .......... .......... .......... .......... .......... ........T. ........T. .......... .......... .......... .....			1																									1	0
			Hap22	.......... .......... .......... .......... .......... .......... .......... ........T. ........T. ......T... .......... .......... .....			2												1													3	0
			Hap33	.......... .......... .......... .......... .......... .......... ......T... .......... .......... .......... .......... .......C.. .....			1																									1	0
			Hap38	.......... .......... .......... .......... .......... .......... .......C.. ....C..... .......... .......... .......... .......... .....							2		1																			3	0
			Hap39	.....A.... .......... .......... .......... .......... .......... .......... ....C..... .......... .......... .......... .......... .....							2																					2	0
			Hap42	.......... .......... .......... .......... .......... .......... .......... ........T. ........T. .......... .......... .....G.... .....	5		1																									6	0
			Hap43	.......... .......... .......... .......... .......... .......... .......... ........T. ........T. .......... .......... .G........ .....	1																											1	0
			Hap44	.......... .......... .......... .......... .......... .......... .......... ....C..... ........T. .......... .......... .........C .....	5																											5	0
			Hap52	.......... .......... .......... .......... .......... .......... .......... .......... .......... ....A..... .......... .......... .....	2																1											3	0
			Hap53	.......... .......... .......... .......... .......... .......... .......... ........T. .......... .......... .......... ....G..... .....																										1		1	0
			Hap57	.......... .......... C......... .......... .......... .......... .......... ........T. ........T. .G........ ......C... .......... .....					2																							2	0
			Hap58	..C....... .......... .......... .......... .......... .......... .......... .......... .......... .......... .......... .......... .....					1																							1	0
			Hap59	.......... .......... .......... .......... .......... .......... .......... ....C...T. .......... .......... .......... ........TC .....					3																							3	0
			Hap60	.....A.... .......... .......... .......... .......... ......A... .......C.. ........T. ........T. .......... .......... .......... .....																										2		2	0
			Hap61	.......... .......... .......... .......... .......... .......... .......... ........T. ........T. .......... ......C... .......... .....					4																					2		6	0
			Hap70	.......... .......... .......... .......... .......... .......... .......... .......... .......GT. .......... .......... .......... .....					1				6		1																	8	0
			Hap71	.......... .......... ....C..... .......... .......... .......... .......... .......... ........T. .......... .......... .......... .....					2																							2	0
			Hap72	.......... .......... .......... .......... .......... .......... .......... ........T. .......... ......T... ......C... .......... .....					3																							3	0
			Hap73	.......... .......... .......... .......... .......... ......A... .......... ........T. .......... .......... .......... .......... .....											1						1											2	0
			Hap74	.......... .......... .......... .......... .......... .......... .......... .......CT. .......... .......... .......... .......... .....													1															1	0
			Hap75	.......... .......... .......... .......... .......... .......... .......... ....C...T. ........T. .......... .......... .......... .....																	9											9	0
			Hap76	.......... .......... .......... .......... .......... .......... .......... .......... A.......T. .......... .......... .......... .....	1																2					1						4	0
			Hap78	.......... .......... .......... .......... .......... .......... .......... .......... ........T. .......... .......... .........C .....	1																											1	0
			Hap81	.......... .......... .......... .......... .......... .......... .......... .......... ........T. .......... ........A. .......... .....	1																											1	0
			Hap96	.......... .......... .......... .......... .......... .......... ......T... ......G.T. .......... .......... .C........ .......... .....																										1		1	0
			Hap98	.......... .......... .......... .......... .......... .......... .......... .......... .......... .......... .C........ .........C .....																											1	0	1
			Hap104	.......... .......... .......... .......... .......... .......... .......... ........T. .......... .......... .C........ .......... .....																							1					0	1
			Hap105	.......... .......... .......... .......... .......... .......... .......... ........T. .......... .......G.. .......... .......... .....														1									4		3			0	8
			Hap106	....G..... .......... .......... .......... .......... .......... .......... ........T. .......... ......T... .......... .......... .....			1																									1	0
			Hap108	.......... .......... ..G....... .......... .......... .......... .......... .......... ........T. .......... .......... .......... .....																				2								2	0
			Hap110	.......... .......... .......... .......... .......... .......... .......... .......... ....C...T. .......... .......... .......... .....																				1								1	0
			Hap111	.......... .......... .......... ..C....... .......... .......... .......... .......... ........T. .......... .......... .......... .....																				1								1	0
			Hap113	.......... .......... .......... .......... .......... .......... C......... .......... ........T. .......... .......... .......... .....																				1								1	0
			Hap114	.......... .......... .......... .......... .......... .......... .......... .......... ........T. ........A. .......... .......... .....																				2								2	0
			Hap115	.......... .......... .......... .......... .......... .......... .......... .......... ........T. .......... .......... .......... ...G.																				1								1	0
			Hap128	.......... .......... .......... .......... .......... .......... .......... ....C...T. .......... .......... ....G..... .......... .....	2																											2	0
			Hap129	.......... .......... .......... .......... .......... .......... .......... .......... .......... ......T... .......... .......... .....															1													1	0
			Hap131	.......... .......... .......... .......... .......... .......... .......... ....C..... ........T. .......... .......... .......... .....											3																	3	0
			Hap134	.......... .......... .......... .......... .......... .......... .........C ........T. ........T. .......... .......... .......... .....																							1					0	1
			Hap137	.......... .......... .......... .......... .......C.. .......... .......... ........T. ........T. .......... .......... .......... .....													8															8	0
			Hap138	.......... .......... .......... .......... .......C.. .......... .......... ........T. .......... .......... .......... .......... .....													3															3	0
			Hap139	.......... .......... .......... .......... .......C.. .......... .......... .......... ........T. .......... .......... .......... .....													1															1	0
			Hap141	.......... .......... .......... .......... .......... ..T....... .......... .......... .......... .......... .......... .......... .....							1																					1	0
			Hap142	.......... .......... .......... .......... .......... .......... .......... .......... ........T. .......... .......... ........T. .....											1																	1	0
			Hap154	.......... .......... .......... .......... .......... .......... .......... .......... .......... .......... ......C... .......... .....															1													1	0
			Hap156	.......... .......... .......... .......... .......... .......... ......T... ........T. .......... .......... .......... .......... .....									3																			3	0
			Hap158	.......... .......... .......... .......... .......... .......... ......T... ........T. ........T. .......... .......... .......... .....											1																	1	0
			Hap159	.......... .......... .......... .......... .......... .......... ......T... ........T. ........T. .......... .C........ ....G..... .....																							1					0	1
			Hap163	.......... .......... .......... .......... .......... .......... .......... .......... .......... .......... .C........ .......... .....							14																					14	0
			Hap167	.......... .......... .......... ...A...... .......... ....A..... .......... .......... ........T. .......... .......... .......... .....											1																	1	0
			Hap170	.......... .......... C......... .......... .......... .......... .......... ........T. .......... .......... .......... .......... .....											3																	3	0
			Hap173	.......AG. G......... .......... .......... .......... .......... ..G....... ........T. ........T. .......... .......... .......... .....													1															1	0
			Hap174	.......... .......... .......... .......... .......... .......... .......C.. ........T. .......... .......... .......... .......... .....													1															1	0
			Hap178	.......... .......... .......... .......... .......... .......... .......... ........T. .......... .....T.... .......... .......... .....																									6			0	6
			Hap181	.......... .......... .......... .......... .......... .......... .......... .......... .........T .......... ......C... .......... .....																		2										0	2
			Hap184	.......... .......... .......... .......... .......... .......... .......... ....C...T. .T........ .......... .......... .......... .....																1												0	1
			Hap185	T......... .......... .......... .......... .......... .......... .......... .......... .T........ .......... .......... .......... .....																1												0	1
			Hap186	.......... .......... .......... .......... .......... .......... ......T... .......... .......... .......... .......... .......... .....	1															1												1	1
			Hap189	.......... .......... .......... .......... .......... .......... .......... .......... ......C... .......... .......... .......... .....										2																		0	2
			Hap190	.......... .......... .......... .......... ....G..... .......... .......... ........T. .......... .......... .......... .......... .....										1																		0	1
			Hap192	.......... .......... .......... .......... .......... .......... .......... ........T. .T........ .......... .......... .......... .....								1																				0	1
			Hap194	.......... .......... .......... .......... .......... .......... .......... .......... .......... .......... .......... .......... C....								2																				0	2
			Hap199	.......... .......... .......... .......... .......... .G........ .......... .......... .T.......T .......... .......... .......... .....												2																0	2
			Hap200	.......... .......... .......... .......... .......... .......... .......C.. ........T. ........T. .......... .......... .......... .....											1																	1	0
			Hap202	.......... .......... .......... .......... .......... .......... .......C.. .......... ........T. .......... .......... .......... .....																			1									1	0
			Hap204	.......... .......... .......... .......... .......... .......... .......... ........T. .......... .......... .......... .......... ..T..											1																	1	0
			Hap205	.......... .......... .......... .......... .......... .......... .......... ........T. ........T. .......... .......... .........C .....	6																											6	0
			Hap206	.......... .......... .......... ......C... .......... .......... .......... ........T. .......... .......... .......... .......... .....	2																											2	0
			Hap207	.......... .......... .......... .......... .......... .....C.... .......... ....C..... .......... .......... .......... .........C .....	1																											1	0
			Hap230	.......... .......... .......... .......... .......... .........A .......... .......... .......... .......... .......... .......... .....											1																	1	0
			Hap231	.......... .........C .......... .......... .......... .......... .......... .......... ........T. .......... .......... .......... .....															1													1	0
			Hap232	.......... .......... .......... .......... .......... .......... .......... .......... ........T. .......... .......... ..A....... .....															2													2	0
			Hap234	.......... .......... .......... .......... .......... .......... .......C.. .......... .......... .......... .......... .......... .....							1																					1	0
			Hap236	.......... .......... .......... .......... .......... .......... ......T... ........T. .......... .......G.. .......... .......... .....																					1							0	1
			Hap241	.......... ...G...... .......... .......... .......... .......... .......... .......... .......... .......... .......... .......... .....					1																							1	0
			Hap242	....T..... .......... .......... .......... .......... .......... .......... ........T. .......... .......... .......... .......... .....					1																							1	0
			Hap243	.......... .......... .......... .......... .......... .......... .......... ..G.....T. .......... .......... .......... .......... .....					1																							1	0
			Hap235	....A..... .......C.. .......... .......... ...C...... .......... ....G..... ....C...T. .......... .....T.... .......... .......... .....																					1							0	1
		sm.amts of subgroup M1			198	17	57	0	177	9	164	25	104	7	227	32	18	2	98	33	48	3	155	13	3	6	10	26	34	21	1	1329	159
	M2		Hap35	.....A.... .......... .......... .......... .......... .......... .......C.. ....C..... .......... .......... .......... .......... .....			15		31		17	3																				63	3
			Hap151	.....C.... .......... .......... .......... .......... .......... .......C.. ....C..... .......... .......... .......... .......... .....					1																							1	0
			Hap152	.....A.... .......... .......... .......... .......... .......... .......C.. .......... .......... .......... .......... .......... .....					1																							1	0
			Hap36	.....A.... .......... .......... .......... .......... .......... .......C.. ....C..... .......... .......... .......... ....G..... .....					6																							6	0
			Hap29	.....A.... .......... .......... .......... .......... .......... .......C.. ....C...T. .......G.. .......... .......... .......... .....			2			4																						2	4
			Hap64	.....A.... .......... .......... .......... .......... .......... .......C.. A...C..... .......... .......... .......... .......... .....					16																							16	0
			Hap63	.....A.... .......... .......... .......... .......... .......... ......TC.. ....C...T. ........T. .......... .......... .......... .....					2																							2	0
			Hap49	.....A.... .......... .......... .......... .......... .......... .......C.. ....C...T. .......... .....T.... .......... .......... .....					2																							2	0
			Hap50	.....A.... .......... .......... .......... .......... .......... .......C.. ....C...T. .......... .......... .......... .......... .....					1							1																1	1
			Hap40	.....A.... .......... .......... .......... .......... .......... .......C.. ....C..... .......... ...G...... .......... .......... .....							1																					1	0
			Hap25	.....A.... .......... .......... .......... .......... .......... .......C.. ....C..... .......... .......... .C........ .......... .....			2																									2	0
			Hap240	.....A.... .......... .......... .......... .......... .......... .......C.. ....C...T. .......... ....A..... .......... .......... .....					1																							1	0
			Hap233	.....A.... .......... .......... .......... .......... .......... .......C.. ....C..... .......... ......T... .......... .......... .....					1																							1	0
	M3		Hap1	.......... .......... .......... .......... .......... .......... ......T... ....C...T. .......... .......G.. .C.....C.. ....G..... .....		19	27	4																								46	4
			Hap4	.......... .......... .......... .......... .......... .......... ......T... ....C..CT. .......... .......G.. .C.....C.. ....G..... .....			3																									3	0
			Hap23	.......... .......... .......... .......... .......... ......A... ......T... ....C...T. .......... .......G.. .C.....C.. ....G..... .....			1																									1	0
			Hap24	.......... .......... .......... .......... .......... .......... ......T... ....C...T. .......... .......G.. .C.....C.. ....G..... .A...			2																									2	0
			Hap28	.......... .......... .......... .......... .......... .......... ......T... ....C...T. .......... .......G.. .C.....C.. ....G..... ..T..			2																									2	0
			Hap223	....A..... .......... .......... .......... .......... .......... ......T... ....C...T. .......... .......G.. .C.....C.. ....G..... .....			2																									2	0
			Hap224	.......... .......... .......... .......... .......... .......... ......T.T. ....C...T. .......... .......G.. .C.....C.. ....G..... .....			1																									1	0
			Hap225	.......... .......... .......... .G........ .......... .......... ......T... ....C...T. .......... .......G.. .C.....C.. ....G..... .....			1																									1	0
			Hap227	.......... .......... .......... .......... .......... .......... ......T... ....C...T. ..C....... .......G.. .C.....C.. ....G..... .....				1																								0	1
			Hap228	.....A.... .......... .......... .......... .......... .......... ......T... ....C...T. .......... .......G.. .C.....C.. ....G..... .....				1																								0	1
			Hap229	.....A.... ..C....... .......... .......... .......... .......... ......T... ....C...T. .......... .......G.. .C.....C.. ....G..... .....				1																								0	1
			Hap2	.......... .......... .......... .......... .....C.... .......... ......T... ....C...T. .......... .......... .C.....C.. ....G..... .....			1																									1	0
			Hap3	.......... .......... .......... .......... .......... .......... ......T... ....C...T. .......... .......... .C.....C.. ....G..... .....			6																									6	0
			Hao26	.......... .......... .......... .......... .......... .......... ......T... ....C..CT. .......... .......... .C.....C.. ....G..... .....			1																									1	0
			Hap48	.......... .......... .......... .......... .......C.. .......... ......T... ....C...T. .......... .......... .C.....C.. ....G..... .....			1																									1	0
			Hap226	.......... .......... .......... .......... .......... .......... ......T... ....C...T. .......... .......... .C.....C.. .......... .....			1																									1	0
			Hap237	.......... .......... .......... .......... .......... .......... ......T... ........T. ...T...... .......... .C........ ....G..... .....						1																						0	1
			Hap222	.......... .......... .......... .......... .......... .......... ......T... ........T. .......... .......G.. .C.....C.. ....G..... .....		1																										1	0
			Hap145	.......... .......... .......... .......... .......... .......... ......T... ........T. .......... .......... .C........ .......... .....						3																						0	3
			Hap65	.......... .......... .......... .......... .......... .......... .......... ....C...T. .....TC... .......... .C........ .......... .....						2																						0	2
			Hap147	.......... .......... .......... .......... .......... .......... ......T... ....C...T. ........T. .......... .C........ .......... .....						2		1																				0	3
			Hap195	.......... .......... .......... .......... .......... .......... ......T... ....C...T. .......... .......... .......... .......... .....								1																				0	1
			Hap196	.......... .......... .......... ....T..... .......... .......... ......T... ....C...T. .......... .......... .C.....C.. ....G..... .....								1																				0	1
			Hap197	.......... .......... .......... .......... .......... ......A... ......T... ....C..CT. .......... .......... .......... .......... .....								1																				0	1
			Hap198	.......... .......... .......... .......... .......... ......A... ......T... ....C...T. ........T. .......... .C........ .......... .....								1																				0	1
			Hap182	.......... .......... .......... .......... .......... .......... ......T... ....C..... ........T. .......G.. .C........ .......... .....								1																				0	1
			Hap193	.......... .......... .......... .......... .......... .......... ......T... ....C..CT. ........T. .......... .C........ .......... .....								1																				0	1
			Hap177	.......... .......... .......... .......... .......... .......... ......T... ....C...T. .......... .......... .C........ ....G..... .....								2																				0	2
					Tibetan high land	Pacific Island	ISEA		SEA		Yunnan		URYZ		MDYZ		Taiwan		SC		MUYR		DRYR	Korean		Japan		NEC		SA
					Domestic	Domestic	Domestic	Wild	Domestic	Wild	Domestic	Wild	Domestic	Wild	Domestic	Wild	Domestic	Wild	Domestic	Wild	Domestic	Wild	Domestic	Domestic	Wild	Domestic	Wild	Domestic	Wild	Domestic	Wild
		Total			218	49	146	7	266	31	190	37	104	9	256	35	19	4	99	37	51	15	174	19	48	8	16	26	34	38	19	1663	292
		sm.amts of haplogroup M			198	37	125	7	239	21	182	37	104	7	227	33	18	2	98	33	48	3	155	13	3	6	10	26	34	21	1	1497	191
		sm. Amts except haplogroup M			20	12	21	0	27	10	8	0	0	2	29	2	1	2	1	4	3	12	19	6	45	2	6	0	0	17	18	166	101
DW1			Hap68	.......... .......... .......C.. .......... .......C.. .......T.. ......T... ........T. ........T. .......... ......C... .......... .....																										8	7	8	7
			Hap69	.......... .......... .......C.. .......... .......C.. .......T.. ......T... ....C...T. ........T. .......... ......C... .......... .....																										4	1	4	1
			Hap99	.......... .......... .......C.. .......... .......C.. .......T.. ......T... ......G.T. ........T. .......... ......C... .......C.. .....																											1	0	1
			Hap169	.......... .......... .......C.. .......... .......C.. .......T.. ......T... ....C...T. ........T. .......... ......C... ....G..... .A...																											1	0	1
DW2			Hap171	.......... .......... .......... .......T.. .......... .......... .......... ........T. .......... .G........ .......... .......... .....														1														0	1
			Hap175	.......... .......... .......... .......T.. .......... .......... .......... ........T. .......... .......... .......... .......... .....													1															1	0
DW3			Hap150	.......... .......... .......... ........AT A.CAT.AC.. .......... .......... ........T. .......... .......... .......... .......C.. .....					1																							1	0
			Hap176	.......... .......... .......... .........T A.CAT.AC.. .......... .......... ........T. .......... .......... .......... .......... .....						2																						0	2
D1			Hap79	....G..... .......... .......... ....G..... .......... .......... .......... ........T. ........T. ...G...... .......... .......... .....	1																											1	0
			Hap80	....G..... .......... .......... ....G..... .A........ .......... .......... ........T. ........T. ...G.....A .......... .......... .....	1																											1	0
			Hap92	....G..... .......... .......... ....G..... .......... .......... .......... .......... ........T. ...G.....A .......... .......C.. .....	1																											1	0
			Hap86	....G..... ........T. .......... ....G..... .......... .......... ...A...... .A........ ........T. ..AG...... .......... .......... .....	1																											1	0
			Hap91	....G..... .......... .........G ....G..... .......... .......... .......... .......... ........TA ...G...... .......... .......... .....	1																											1	0
			Hap93	....G..... .......... .......... ....G..... .......... .......... .......... .......... ........T. ...G...... .......... .......... .....	1																											1	0
			Hap82	.......... .......... .......... .......... .......... .......... .......... .......... ........T. ...G.....A ........A. .......... .....	1																											1	0
			Hap87	....G..... .......... .......... .......... .......... .......... .......... .......... ........T. ...G.....A ........A. .......... .....	1																											1	0
			Hap83	....G..... .......... .......... .......... .......... .......... .......... .......... A.......T. ...G...... .......... .......... .....	1																											1	0
			Hap84	....G..... .......... .......... .......... .......... .......... .......... .......... ........T. ...G...... .......... .......... .....	2																											2	0
			Hap89	....G..... .......... .......... .......... .A........ .......... .......... .......... ........T. ...G...... .......... .......... .....	1																											1	0
			Hap94	....G..... .......... .......... .......... .......... .......... .......... .......... ........T. ...G...C.. ...C...... .......... .....	2																											2	0
			Hap85	.......... .......... .......... .......... .......... .......... .......... .......... A......... ...G...... .......... .......... .....	1																											1	0
			Hap90	.......... .......... .......... .......... .......... .......... .......... .......... ........T. ...G...... .......... .......... .....	1																											1	0
			Hap95	.......... .......... .......... .......... .......... .......... .......... .......... ........T. ...G...... .......... .........C .....	1																											1	0
D2			Hap77	.......... .........C .......... .......... .......... .......... ......T... .......... ......C.T. .......... .......... ........T. .....																	3											3	0
			Hap157	.......... .........C .......... .......... .......... .......... ......T... .......... ........T. .......... .......... ........T. .....											5																	5	0
D3			Hap88	.......... .......... .......... .......... .......... .......... .......... .......... .......... .......... .......... ......G... .....	1																											1	0
			Hap166	.......... ....C..... .......... .......... .......... .......... .......... .......... .......... .......... .......... ......G... .....							2																					2	0
D4			Hap54	.......... .......... .......... .......... .......... .......... .......... ....C...T. .......... ....A..... .......... .......... .....																										3		3	0
			Hap55	.......... .......... .......... .......... .......... ........T. .......... ....C...T. .......... ....A..... .......... .......... .....																										1		1	0
			Hap56	..C....... .......... .......... .......... .......... .......... .......... ....C...T. .......... ....A..... .......... .......... .....																										1		1	0
D5			Hap62	.....A.... .......... .......... .......... ........T. .......... .......C.. ....C...T. .......... .......... .......... .......... .....					12																							12	0
			Hap130	.......... .......... .......... .......... ........T. .......... .......C.. ....C...T. .......... .......... .......... .......... .....					1																							1	0
D6			Hap47	.......... .......... .......... .......... .......... .......... ......T... ....C...T. .......... .......G.. .C........ ....G..... .....		11	3																									14	0
			Hap136	.......... ......C... .......... .......... .......... .......... ......T... ....C...T. .......... .......G.. .C........ ....G..... .....		1																										1	0
D7			Hap14	.......... .......... .......... .......... .......... .......... .......... ........T. ........T. .......... .......... .......C.. .....	2						4																					6	0
			Hap27	.......... .......... .......... .......... .......... .......... .......... ........T. ........T. .......... G......... .......C.. .....			1		4																							5	0
			Hap41	.......... .......... .......... .......... .......... .......... .......... ....C...T. ........T. .......... G......... .......C.. .....							2																					2	0
			Hap140	.......... .......... .......... .......... .......... .G........ ......T... ........T. ........T. .......... G......... .......C.. .....					4																							4	0
D8			Hap45	.......... .......... .......... .......... .......... .......... .......C.. .......... .......... ......T... .......... .......... .....											18								10									28	0
			Hap46	......A... .......... .......... .......... .......... .......... .......C.. .......... .......... ......T... .......... .......... .....											4																	4	0
			Hap116	.......... .......... .......... A......... .......... .......... .......C.. ........T. .......... ......T... .......... .......... .....											1																	1	0
			Hap135	.......... .......... .......... .......... .......... .......... .......C.. .......... .......... .G....T... .......... .......... .....																			9									9	0
			Hap155	.......... .......... .......... .......... .......... .......... .......C.. ....C..... .......... ......T... .......... .......... .....															1													1	0
E			Hap6	.......... .......... .......... ....T....T ....G..C.C ...C..A... .......... ........T. .......... ....A..... .C....C... .......C.. .....			2																			1	1					3	1
			Hap101	.......... .......... .......... ....T....T ....G..C.C ...C..A... ......T... ........T. .......... ....A..... .C....C... .......C.. .....			5								1																	6	0
			Hap31	.......... .......... .......... ....T..... ....G..C.C ...C..A... ......T... ........T. .......... ....A..... .C....C... .......C.. .....			3																	4								7	0
			Hap32	.......... .......... .......... ....T..... ....G..C.C ...C..A... ......T... ........T. .......... ....A..... .C........ .......C.. .....			3		5																							8	0
			Hap109	.......... .......... .......... ....T..... ....G..C.C ...C..A... ......T..C ........T. .......... ....A..... .C....C... .......C.. .....																				1								1	0
			Hap112	.......... .......... .......... ....T...C. ....G..C.C ...C..A... ......T... ........T. .......... ....A..... .C....C... .......C.. .....																				1								1	0
			Hap203	.......... .......... .....T.... ....TA.... ....G..C.C ...C..A... ......T... ........T. ........T. ....A..... .C....C... .......C.. .....																						1						1	0
			Hap102	.......... .......... .......... A...T..... ..G.G..C.C .......... ......T... ........T. ......C.T. .......... .C........ .......C.. .....			3																									3	0
			Hap103	.......... .......... .T........ A...T..... ..G.G..C.C .......... ......T... ........T. ......C.T. .......... .C........ .......C.. .....			1																									1	0
W1			Hap97	...C...... .......... ........C. .......... .T.....C.. .G....A... .........C ....C...T. ........T. .....T.... ....G..... .......C.. A....																											1	0	1
			Hap100	...C...... .......... ........C. .......... .T.....C.. .G........ .........C ........T. ........T. ....A..... ....G..... .......... AA...																											4	0	4
			Hap148	...C...... .......... ........C. .......... .T.....C.. .G........ .........C ........T. ........T. ....A..... ....G....C .......... AA...																											1	0	1
			Hap153	...C.....G .......... ........C. .......... .T.....C.. .G........ ......T..C ....C..CT. ........T. ....A..... ....G.C... .......... AA...																											1	0	1
			Hap168	...C...... .......... ........C. .......... .T.....C.. .G....A... .........C ....C...T. ........T. .......... ....G..... .......C.. A....																											1	0	1
W2			Hap117	.......... .......... ...G...... .......... .......... .......... .......... ........T. ...T...... .......... .......... .......... .....																					10							0	10
			Hap122	.......... .......... ...G...... .......... .......... .......... .......... ........T. ...T...... .......... .......... A......... .....																					1							0	1
W3			Hap160	.......... .......... .......... .......... .......... .......... ......T... ........T. ........T. ......T... .C........ ....G..... .....																							1					0	1
			Hap161	.......... .......... .......... .......... .......... .......... ......T... ....C...T. ........T. ......T... .C........ ....G..... .....																							1					0	1
			Hap162	.......... .......... .......... .......... .......... .......... ......T... ....C...T. ........T. ......T... .......... ....G..... .....																							1					0	1
W4			Hap132	.......... .......... .......... .......... .......... ......A... .......... ........T. .......... .......... .C........ .......... .....																							1					0	1
			Hap133	.......... .......... .......... .......... .......... ......A... .......... ........T. .T........ .......... .C........ .......... .....																							1					0	1
W5			Hap144	.......... .......... .......... .......... .......... .......... ......T... ........T. ........T. .......... .C....C... .......... .....						1																						0	1
			Hap146	.......... .......... .......... .......... .......... .......... ......T... ........T. ........T. .......... .C....C... ........T. .....						1																						0	1
W6			Hap143	.......... .......... .......... .......... .......... .......... ......T... ........T. ........T. .......... .C...G.C.. ....GG..T. .....										1								6										0	7
			Hap180	.......... .......... .......... .......... .......... .......... ......T... ........T. ........T. .......... .C...G.C.. ....GG..T. C....																		5										0	5
			Hap201	.......... .......... .......... .......... .......... .......... ......T... ....C...T. ........T. .......... .C...G.C.. ....GG..T. C....										1																		0	1
			Hap191	.......... .......... .......... .......... .......... .......... ......T... ........T. ........T. .......... .C...G.... ....GG..T. .....																		1										0	1
			Hap187	.......... .A........ .......... .......... .......... .......... ......T... ........T. .......... .......... .C.....C.. ....G...T. .....												2				3												0	5
			Hap188	.......... .A........ .......... .......... .......... .......... ......T... ....C...T. ...T...... .......... .C.....C.. ....G...T. .....																1												0	1
W7			Hap66	.......... .......... ......C... .......... .......... .......... ......T... ........T. ...T.....T .......... .......... ....G..... .....						2																						0	2
			Hap67	.......... .......... ......C... .......... .......... .......... ......T... ........T. ...T.....T C......... .......... ....GG.... .....						2																						0	2
			Hap238	.......... .......... ......C... .......... .......... .......... ......T... ........T. ...T.....T .......... .......C.. ....G..... .....						1																						0	1
			Hap239	.......... .......... ......C... .......... .......... .......... ....G.T... ........T. ...T.....T .......... .......C.. A...GG.C.. .....						1																						0	1
			Hap120	.......... .......... .......... .......... .......... .......... ......T... ........T. ...T.....T .......... ......C... .......... .....														1							13							0	14
			Hap165	.......... .......... .......... .......... .......... .......... ......T... ........T. ...T.....T .......... ......C... ...C...... .....																					1							0	1
			Hap118	.......... .......... .......... .......... .......... .......... ......T... ....C...T. .........T .......... .C........ .......... .....																					3							0	3
			Hap119	.......... .......... .......... .......... .......... .......... ......T... ........T. .........T .......... .C....C... .......... .....																					8							0	8
			Hap121	.C........ .......... .......... .......... .......... .......... ......T... ........T. .........T .......... .C....C... .......... .....																					1							0	1
			Hap123	.......... .......... .......... .......... .......... .......... .A....T... ....C...T. .........T .......... .C........ .......... .....																					2							0	2
			Hap124	.......... .......... .......... .......... .......... .......... ......T... ...CC...T. .........T .......... .C........ .......... .....																					1							0	1
			Hap125	.......... .......... ...G.....T .......... .......... .......... ......T... .....C..T. .........T .......... .C....C... .......... .....																					1							0	1
			Hap126	.......... .......... .......... .......... .......... C......... ......T... ....C...TA .........T .......... .C........ .......... .....																					1							0	1
			Hap127	.......... .......... .......... .......... .......... .......... ......T... ....C...T. .........T .......... .CC....... .......... .....																					1							0	1
			Hap149	.......... .......... .......... .......... .......... .......... .....GT... ........T. .........T .......... .C....C... .......... .....																					1							0	1
			Hap164	.......... .......... .......... .......... .......... .......... ......T... ....C...T. .T.......T .......... .C........ .......... .....																					1							0	1
